# Supplementary material for: A user-centred approach to developing bWell, a mobile app for arm and shoulder exercises after breast cancer treatment
Source: J Cancer Surviv. 2017 Jul 24;11(6):732–42. doi: 10.1007/s11764-017-0630-3 (PMC5671540; doi:10.1007/s11764-017-0630-3)
Supplement: Supplementary file 4 — (PDF 347 kb) [file 11764_2017_630_MOESM4_ESM.pdf]

**Study ID:**  
**Date:**

**We would like your views on the exercise app. All feedback will be helpful and treated in the strictest confidence. Could you please rate the different aspects of the exercise app in this questionnaire (please circle as appropriate).**

**Which device did you use the app on?**

- |                                          |                            |                                   |                           |
|------------------------------------------|----------------------------|-----------------------------------|---------------------------|
| 1. iPhone – <i>please specify model:</i> | iPhone 4S                  | iPhone 5<br>Phone 5S<br>iPhone 5C | iPhone 6<br>iPhone 6 Plus |
| 2. iPad – <i>please specify model:</i>   | iPad 2<br>iPad 3<br>iPad 4 | iPad Air                          | iPad Mini<br>iPad Mini 2  |
| 3. iPod Touch (5G model)                 |                            |                                   |                           |

### How easy was it to install the app on your device?

1. Very easy                      2. Fairly easy                      3. Rather difficult                      4. Difficult

**On average, how often did you use the app during the study?**

1. Several times a day    2. Almost daily    3. Few times a week    4. Few times a month

**The app was reliable and there were no technical issues**

1. Strongly agree                      2. Agree                      3. Disagree                      4. Strongly disagree

**It was difficult to learn how to use the app**

1. Strongly agree                      2. Agree                      3. Disagree                      4. Strongly disagree

**It was easy to navigate through the app (e.g. moving between the screens)**

1. Strongly agree                      2. Agree                      3. Disagree                      4. Strongly disagree

**The text for labels and buttons was clear and concise**

1. Strongly agree                      2. Agree                      3. Disagree                      4. Strongly disagree

**The design of the app was too overwhelming (e.g. too many links or features)**

1. Strongly agree                      2. Agree                      3. Disagree                      4. Strongly disagree

**The app looked very appealing and enhanced my experience**

1. Strongly agree      2. Agree      3. Disagree      4. Strongly disagree

**The colours used provided poor contrast and poor readability**

1. Strongly agree      2. Agree      3. Disagree      4. Strongly disagree

**The font size and spacing of text ensured good readability**

1. Strongly agree      2. Agree      3. Disagree      4. Strongly disagree

**The app kept me highly motivated and engaged throughout my use of it**

1. Strongly agree      2. Agree      3. Disagree      4. Strongly disagree

## **Supplementary material – Figure III: App Evaluation Questionnaire – continued**

### **Section C – Content**

**How useful were the videos of the exercises (individual and long session)?**

1. Very useful    2. Somewhat useful    3. Useful    4. Not useful at all

**How clear were the videos (images)?**

1. Very clear    2. Somewhat clear    3. Clear    4. Not clear at all

**How clear was the sound?**

1. Very clear    2. Somewhat clear    3. Clear    4. Not clear at all

**How confusing were the instructions of each video?**

1. Very confusing    2. Confusing    3. Somewhat confusing    4. Not confusing at all

**How useful was it to have reminders for the exercises?**

1. Very useful    2. Somewhat useful    3. Useful    4. Not useful at all

**How useful was it to do the daily ratings (mood, pain, flexibility)?**

1. Very useful    2. Somewhat useful    3. Useful    4. Not useful at all

**How useful were the charts of the daily ratings?**

1. Very useful    2. Somewhat useful    3. Useful    4. Not useful at all

### **Section D – Overall Rating**

**How helpful did you find the app after surgery?**

1. Not at all helpful    2. Somewhat helpful    3. Helpful    4. Very useful

**Would you recommend this app to other women with breast cancer?**

1. Would not recommend    2. Would maybe recommend    3. Would definitely recommend

**What is your overall star rating of the app?**

1. \*    One of the worst apps I've used  
2. \*\*  
3. \*\*\*    Average  
4. \*\*\*\*  
5. \*\*\*\*\*    One of the best apps I've used

***Please write any other comments below***

.....

.....

.....

.....

.....

.....

.....

***Thank you very much for completing the questionnaire.  
Please return it to SHORE-C in the stamped and addressed envelope.***
